# Supplementary material
Source: PubMed Central journal article supplement (PMC11029919)
Supplement: 262_2010_870_MOESM1_ESM.pdf [file 262_2010_870_MOESM1_ESM.pdf]

# **Immunogenicity of SEREX-identified antigens and disease outcome in pancreatic cancer**

Cancer Immunology, Immunotherapy

A. Heller\*, I. Zörnig\*, T. Müller, K. Giorgadze, C. Frei, T. Giese, F. Bergmann, J. Schmidt, J. Werner, M.W. Buchler, D. Jaeger, N. A. Giese<sup>#</sup>

\*contributed equally; #corresponding author

Corresponding author: N. A. Giese  
Department of Surgery  
University Hospital Heidelberg  
INF 116  
69120 Heidelberg, Germany  
[nathalia.giese@med.uni-heidelberg.de](mailto:nathalia.giese@med.uni-heidelberg.de)  
Telephone: 49-6221-56 6440  
Fax: 49-6221-56 4830

A. Heller, K. Giorgadze, J. Schmidt, J. Werner, M.W. Buchler, N. A. Giese  
Department of Surgery  
University Hospital Heidelberg  
INF 116  
69120 Heidelberg, Germany

T. Müller, C. Frei, D. Jaeger, I. Zörnig  
Medical Oncology  
National Centre of Tumor Diseases (NCT)  
University Hospital Heidelberg  
INF 350  
69120 Heidelberg, Germany

T. Giese  
Institute of Immunology  
University Hospital Heidelberg  
INF 305  
69120 Heidelberg, Germany

F. Bergmann  
Institute of Pathology  
University Hospital Heidelberg  
INF 262  
69120 Heidelberg, Germany

## Supplementary material

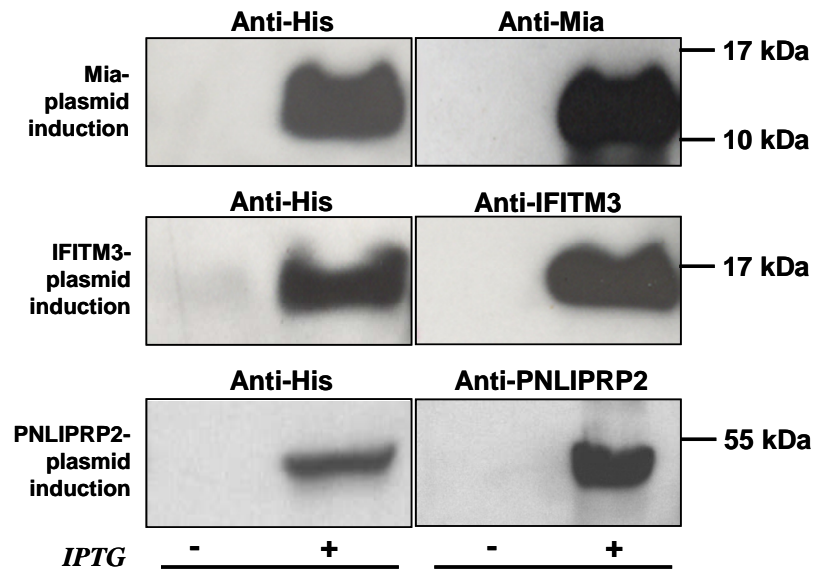

**Supplementary Figure 1: Western blot analysis of induced Mia-, IFITM3- and PNLIPRP2-His-tagged proteins.** *E. coli* M15 bacteria were transformed with a pQE30-His-tag plasmids. Bacteria were lysed in urea buffer, sonicated and the lysates were loaded onto SDS-gels. The IPTG-induced proteins were detected by anti-His (Qiagen), anti-Mia (Santa Cruz), anti-IFITM3 (Abnova) or anti-PNLIPRP2 (Abcam) antibodies. After addition of HRP-conjugated secondary antibodies the signals were visualized by the ECL method. The purity was >80%, determined by SDS-PAGE.

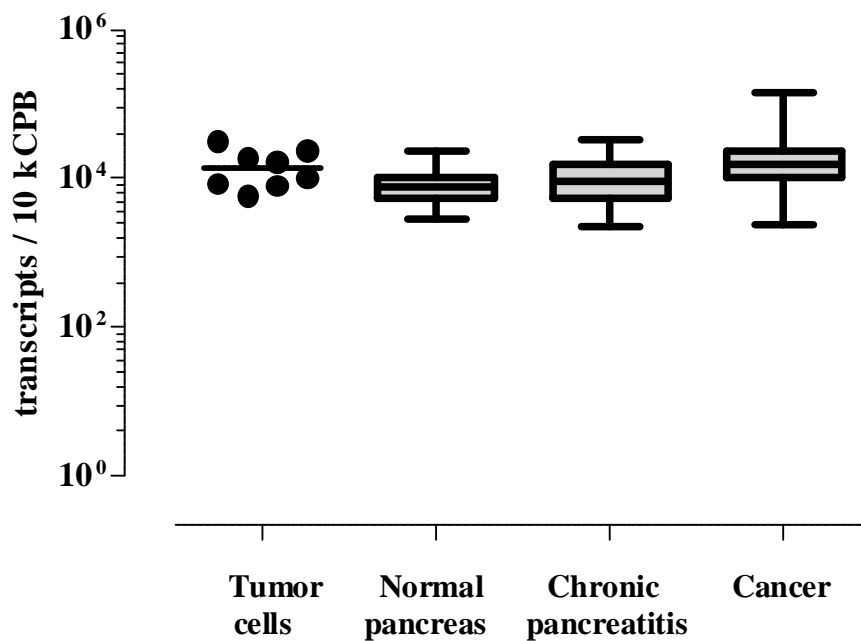

**Supplementary Figure 2. QRT-PCR of IFITM3 mRNA expression.** QRT-PCR showed an ubiquitous mRNA expression of IFITM3 in cultured pancreatic tumor cells, normal and inflammatory pancreas tissues and cancerous pancreatic lesions.

**Supplementary Table 1.** Sequences of primers used for RT-PCR

| Gene           | Primer                                                                        |
|----------------|-------------------------------------------------------------------------------|
| ANXA2          | FOR: 5'-gattttggcctattgaagacacc-3', REV: 5'-tacagccgatcagcaaaatacagg-3'       |
| ATP6V0E1       | FOR: 5'-tctggggctctcgcggtct-3', REV: 5'-attttcaattgcggtccaagag-3'             |
| $\beta$ -Actin | FOR: 5'-ggcatcgtgatggactccg-3', REV: 5'-gctggaaggtggacagcga-3'                |
| COX3           | FOR: 5'-tggcgcgatgtaacacgagaaag-3', REV: 5'-tggcggatgaagcagatagtgagg-3'       |
| DYNC112        | FOR: 5'-ggctcctaaccacctattga-3', REV: 5'-gttcttgcactggagtctttattg-3'          |
| GNB2L1         | FOR: 5'-gatctcacaacgggcaccaccac-3', REV: 5'-tgaagcacaggcggtgatga-3'           |
| HDGFRP3        | FOR: 5'-gatcgggcaacgacacaagaaac-3', REV: 5'-gtgggtcaaggcaggaaaacgat-3'        |
| IFITM3         | FOR: 5'-ggccccacaacctgctc-3', REV: 5'-gtcacgtcgccaacctcttc-3'                 |
| KALRN          | FOR: 5'-accgcaaagatgtggctgtaa-3', REV: 5'-ggagacgggatgcctgaatgac-3'           |
| KEL            | FOR: 5'-tggccccctgcaccgactcttc-3', REV: 5'-ccctgtcccgcgctgctc-3'              |
| LUC7L          | FOR: 5'-gctcgtgtctcgcgaggtctgtc-3', REV: 5'-ctcggcgcctctctcttctga-3'          |
| MIA            | FOR: 5'-atggcccggtccctggtg-3', REV: 5'-actggccccggtgaatgg-3'                  |
| PNLIPRP2       | FOR: 5'-ggcacggaaccagacaccattga-3', REV: 5'-tccggcatttcttctccatt-3'           |
| POSTN          | FOR: 5'-ttgccctggttatatgagaatgga-3', REV: 5'-tgggagcaaagagtgaagtga-3'         |
| RPL13          | FOR: 5'-ccagccggaatggcatggtctgaagc-3', REV: 5'-ccttggctcttttggccgtatgccgaa-3' |
| S100A6         | FOR: 5'-ccggcaggagggtgacaag-3', REV: 5'-aggccccaggaaggtgacatact-3'            |
| SMARCA5        | FOR: 5'-acgctgctggtggtcttg-3', REV: 5'-cggcatagtggctttcttctc-3'               |
| TAGLN          | FOR: 5'-gagccgcgaagtgcagtccaaaat-3', REV: 5'-tgatctgccaggctcctcctgac-3'       |
| TUBA6          | FOR: 5'-acccccgatccactccctctg-3', REV: 5'-actcgccttctccatcccctcac-3'          |
